# Supplementary material for: Effect of Resveratrol-Enriched Rice on Skin Inflammation and Pruritus in the NC/Nga Mouse Model of Atopic Dermatitis
Source: PubMed Central journal article supplement (PMC6471349; doi:10.3390/ijms20061428), 2019-03-21
Supplement: ijms-20-01428-s001.pdf [file ijms-20-01428-s001.pdf]

1 **Supplementary:**

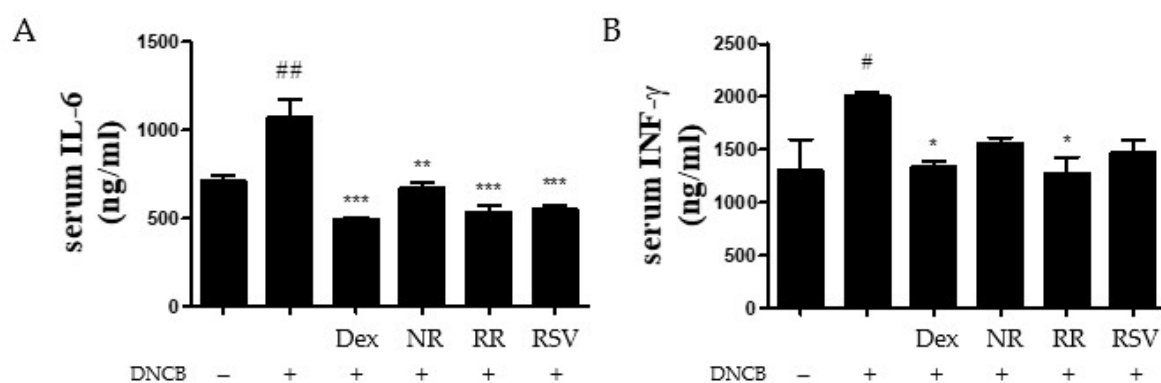

2  
3 **Figure 1.** Inhibitory effects of RR on inflammatory cytokine expression in serum of DNCB-induced  
4 NC/Nga mice. The level of serum IL-6 (A) and INF-gamma (B) were measured using ELISA.

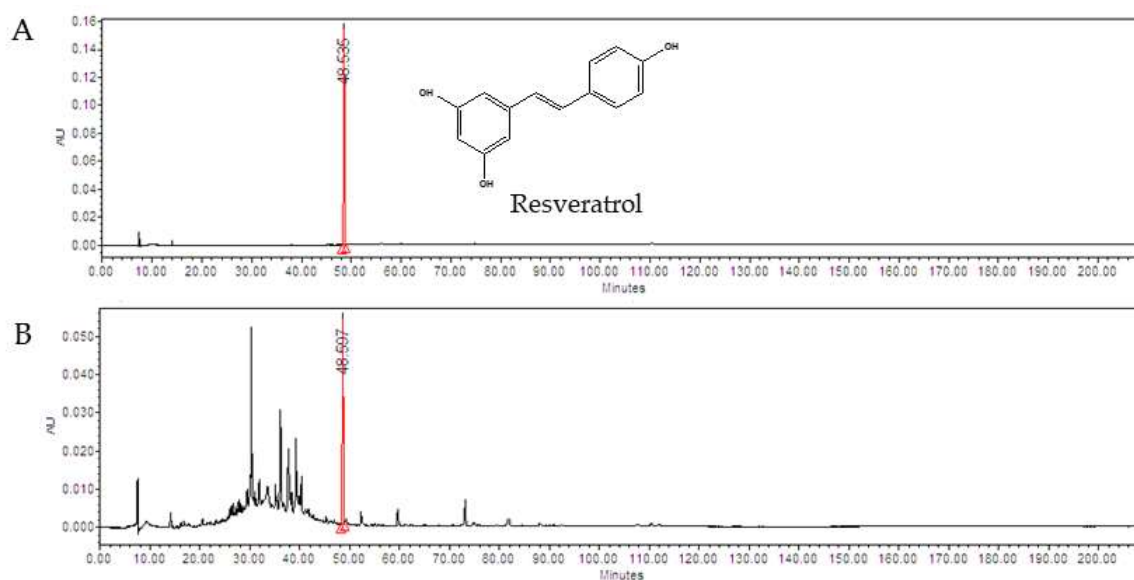

5

---

Content of resveratrol in RR extract ( $\mu\text{g}/1000$  mg of powdered) at 306 nm.

---

| Sample     | Resveratrol     |
|------------|-----------------|
| RR extract | $3.59 \pm 0.65$ |

---

6 **Figure 2.** Contents of Resveratrol in the RR extract.
